# Supplementary material for: Thermo-Economic Analysis of Integrated Hydrogen, Methanol and Dimethyl Ether Production Using Water Electrolyzed Hydrogen
Source: MDPI journal article supplement (doi:10.3390/resources11100085), 2022-09-27
Supplement: s1 [file s1]

## Supplementary Information

### Thermo-economic Analysis of integrated hydrogen, methanol and dimethyl ether production using water electrolyzed hydrogen

**Table S1.** Results of mass and energy balance for hydrogen production process by alkaline water electrolysis (AEL) corresponding to Figure 3 of the manuscript.

| Stream                     | H <sub>2</sub> O | KOH | TOHX1 | TOPUMP | TOREAC             | TOSEP | OXYGEN | L1    | HYDROGEN | LIQ  | REKOH |
|----------------------------|------------------|-----|-------|--------|--------------------|-------|--------|-------|----------|------|-------|
| T (°C)                     | 25               | 25  | 25    | 65     | 66                 | 65    | 65     | 65    | 65       | 65   | 65    |
| P (bar)                    | 1                | 1   | 1     | 1      | 25                 | 25    | 25     | 25    | 25       | 25   | 1     |
| <b>Mass Flows (kg/hr)</b>  |                  |     |       |        |                    |       |        |       |          |      |       |
| Total                      | 675              | 236 | 911   | 911    | 911                | 911   | 598    | 312   | 75       | 237  | 237   |
| CH <sub>3</sub> OH         | 0                | 0   | 0     | 0      | 0                  | 0     | 0      | 0     | 0        | 0    | 0     |
| H <sub>2</sub> O           | 675              | 0   | 675   | 675    | 675                | 0.675 | 0      | 0.675 | 0        | 0.67 | 0.67  |
| KOH                        | 0                | 236 | 236   | 236    | 236                | 236   | 0      | 236   | 0        | 236  | 236   |
| CO <sub>2</sub>            | 0                | 0   | 0     | 0      | 0                  | 0     | 0      | 0     | 0        | 0    | 0     |
| H <sub>2</sub>             | 0                | 0   | 0     | 0      | 0                  | 75    | 0      | 75    | 75       | 0    | 0     |
| O <sub>2</sub>             | 0                | 0   | 0     | 0      | 0                  | 598   | 598    | 0     | 0        | 0    | 0     |
| <b>Energy Balance</b>      |                  |     |       |        |                    |       |        |       |          |      |       |
| Heat duty (kJ/s) for HEAT1 | 33               |     |       |        | Work (kJ/s) for P1 |       |        |       | 1        |      |       |

**Table S2.** Results of mass and energy balance for hydrogen production process by proton exchange membrane (PEM) corresponding to Figure 4 of the manuscript.

| Stream                     | H2O | 1   | 2   | 3   | 4    | 5  | 6                  | 7    | 8  | 9  | 10 | 11   | 12   | 13                 | 14  | 15   | 16  | 17   | 18   | 19  | H2OAN | H2OAT |
|----------------------------|-----|-----|-----|-----|------|----|--------------------|------|----|----|----|------|------|--------------------|-----|------|-----|------|------|-----|-------|-------|
| T (°C)                     | 25  | 25  | 80  | 80  | 90   | 90 | 90                 | 90   | 90 | 90 | 90 | 90   | 90   | 90                 | 90  | 90   | 90  | 90   | 90   | 141 | 90    | 90    |
| P (bar)                    | 1   | 1   | 1   | 25  | 25   | 25 | 25                 | 25   | 25 | 25 | 25 | 25   | 20   | 25                 | 25  | 25   | 20  | 20   | 20   | 35  | 20    | 25    |
| Mass Flows (kg/hr)         |     |     |     |     |      |    |                    |      |    |    |    |      |      |                    |     |      |     |      |      |     |       |       |
| Total                      | 376 | 377 | 377 | 377 | 377  | 42 | 41                 | 0.42 | 45 | 45 | 41 | 3    | 0.42 | 334                | 331 | 3.34 | 331 | 331  | 331  | 41  | 0.37  | 0.003 |
| CH3OH                      | 0   | 0   | 0   | 0   | 0    | 0  | 0                  | 0    | 0  | 0  | 0  | 0    | 0    | 0                  | 0   | 0    | 0   | 0    | 0    | 0   | 0     | 0     |
| H2O                        | 376 | 377 | 377 | 377 | 0.37 | 0  | 0                  | 0    | 0  | 0  | 0  | 0    | 0    | 0                  | 0.3 | 0    | 0.3 | 0.3  | 0    | 0   | 0.37  | 0.003 |
| CO                         | 0   | 0   | 0   | 0   | 0    | 0  | 0                  | 0    | 0  | 0  | 0  | 0    | 0    | 0                  | 0   | 0    | 0   | 0    | 0    | 0   | 0     | 0     |
| CO2                        | 0   | 0   | 0   | 0   | 0    | 0  | 0                  | 0    | 0  | 0  | 0  | 0    | 0    | 0                  | 0   | 0    | 0   | 0    | 0    | 0   | 0     | 0     |
| H2                         | 0   | 0   | 0   | 0   | 42   | 0  | 0                  | 0    | 42 | 42 | 41 | 3    | 0.42 | 0                  | 0   | 0    | 0   | 0.42 | 0.42 | 41  | 0     | 0     |
| O2                         | 0   | 0   | 0   | 0   | 334  | 42 | 41                 | 0.42 | 4  | 0  | 0  | 0    | 0    | 334                | 330 | 3.34 | 330 | 330  | 330  | 0   | 0     | 0     |
| Energy Balance             |     |     |     |     |      |    |                    |      |    |    |    |      |      |                    |     |      |     |      |      |     |       |       |
| Heat duty (kJ/s) for HEAT1 |     |     |     |     | 24   |    | Work (kJ/s) for P1 |      |    |    |    | 0.38 |      | Duty (kJ/s) for R1 |     |      |     |      | 1650 |     |       |       |

**Table S3.** Results of mass balance for hydrogen production process solid oxide electrolyzer (SOE) corresponding to Figure 5 of the manuscript.

| <b>Stream 1 to 14</b>     |        |        |        |        |        |        |        |        |        |        |       |       |       |      |
|---------------------------|--------|--------|--------|--------|--------|--------|--------|--------|--------|--------|-------|-------|-------|------|
| Stream                    | 1      | 2      | 3      | 4      | 5      | 6      | 7      | 8      | 9      | 10     | 11    | 12    | 13    | 14   |
| T (°C)                    | 25     | 25     | 66     | 101    | 115    | 113    | 111    | 800    | 800    | 800    | 800   | 800   | 118   | 800  |
| P (bar)                   | 1      | 2      | 1.9    | 1.8    | 1.7    | 1.6    | 1.5    | 1.3    | 1      | 1      | 1     | 1     | 1     | 1.0  |
| <b>Mass Flows (kg/hr)</b> |        |        |        |        |        |        |        |        |        |        |       |       |       |      |
| Total                     | 110326 | 110326 | 110326 | 110326 | 110326 | 110326 | 110326 | 110326 | 111894 | 111894 | 15680 | 96213 | 96213 | 1568 |
| CH <sub>3</sub> OH        | 0      | 0      | 0      | 0      | 0      | 0      | 0      | 0      | 0      | 0      | 0     | 0     | 0     | 0    |
| H <sub>2</sub> O          | 110326 | 110326 | 110326 | 110326 | 110326 | 110326 | 110326 | 110326 | 110547 | 2211   | 2211  | 0     | 0     | 221  |
| CO                        | 0      | 0      | 0      | 0      | 0      | 0      | 0      | 0      | 0      | 0      | 0     | 0     | 0     | 0    |
| CO <sub>2</sub>           | 0      | 0      | 0      | 0      | 0      | 0      | 0      | 0      | 0      | 0      | 0     | 0     | 0     | 0    |
| H <sub>2</sub>            | 0      | 0      | 0      | 0      | 0      | 0      | 0      | 0      | 1347   | 13470  | 13470 | 0     | 0     | 1347 |
| O <sub>2</sub>            | 0      | 0      | 0      | 0      | 0      | 0      | 0      | 0      | 0      | 96213  | 0     | 96213 | 96213 | 0    |
| <b>Stream 15 to 27</b>    |        |        |        |        |        |        |        |        |        |        |       |       |       |      |
| Stream                    | 15     | 16     | 17     | 18     | 19     | 20     | 21     | 22     | 23     | 24     | 25    | 26    | 27    |      |
| T (°C)                    | 800    | 116    | 25     | 25     | 178    | 71     | 38     | 197    | 106    | 38     | 198   | 120   | 38    |      |
| P (bar)                   | 1.0    | 1.2    | 1.1    | 1.1    | 3.3    | 3.2    | 3.1    | 9.3    | 9.2    | 9.1    | 27.3  | 27.1  | 27    |      |
| <b>Mass Flows (kg/hr)</b> |        |        |        |        |        |        |        |        |        |        |       |       |       |      |

|                         |       |       |      |       |       |       |       |       |       |       |       |       |       |
|-------------------------|-------|-------|------|-------|-------|-------|-------|-------|-------|-------|-------|-------|-------|
| <b>Total</b>            | 14112 | 14112 | 1946 | 12166 | 12166 | 12166 | 12166 | 12166 | 12166 | 12166 | 12166 | 12166 | 12166 |
| <b>CH<sub>3</sub>OH</b> | 0     | 0     | 0    | 0     | 0     | 0     | 0     | 0     | 0     | 0     | 0     | 0     | 0     |
| <b>H<sub>2</sub>O</b>   | 1989  | 1989  | 1946 | 43    | 43    | 43    | 43    | 43    | 43    | 43    | 43    | 43    | 43    |
| <b>CO</b>               | 0     | 0     | 0    | 0     | 0     | 0     | 0     | 0     | 0     | 0     | 0     | 0     | 0     |
| <b>CO<sub>2</sub></b>   | 0     | 0     | 0    | 0     | 0     | 0     | 0     | 0     | 0     | 0     | 0     | 0     | 0     |
| <b>H<sub>2</sub></b>    | 12123 | 12123 | 0    | 12123 | 12123 | 12123 | 12123 | 12123 | 12123 | 12123 | 12123 | 12123 | 12123 |
| <b>O<sub>2</sub></b>    | 0     | 0     | 0    | 0     | 0     | 0     | 0     | 0     | 0     | 0     | 0     | 0     | 0     |

**Table S4.** Results of energy balance for hydrogen production process solid oxide electrolyzer (SOE) corresponding to Figure 5 of the manuscript.

|                         |            |            |            |            |            |            |            |            |            |             |               |
|-------------------------|------------|------------|------------|------------|------------|------------|------------|------------|------------|-------------|---------------|
| <b>Component</b>        | <b>HX1</b> | <b>HX2</b> | <b>HX3</b> | <b>HX4</b> | <b>HX5</b> | <b>HX6</b> | <b>HX7</b> | <b>HX8</b> | <b>HX9</b> | <b>HX10</b> | <b>SOEC-1</b> |
| <b>Heat Duty (kJ/s)</b> | 5221       | 4479       | 3792       | 18790      | 34607      | 57365      | -5844      | -1588      | -3285      | -4006       | 414775        |
| <b>Component</b>        | <b>CP1</b> | <b>CP2</b> | <b>CP3</b> | <b>CP4</b> | <b>P1</b>  |            |            |            |            |             |               |
| <b>Work (kJ/s)</b>      | 7830       | 8184       | 8236       | 8077       | 3          |            |            |            |            |             |               |

**Table S5.** Results of mass balance for methanol production process corresponding to Figure 6 of the manuscript.

|                    |        |       |        |        |        |        |        |        |                  |        |        |        |        |        |        |        |
|--------------------|--------|-------|--------|--------|--------|--------|--------|--------|------------------|--------|--------|--------|--------|--------|--------|--------|
| Stream             | 28     | 29    | 30     | 31     | 32     | 33     | 34     | 35     | 36               | 37     | 38     | 39     | 40     | 41     | 42     | 43     |
| T (°C)             | 192    | 28    | 60     | 38     | 158    | 38     | 126    | 38     | 136              | 167    | 67     | 212    | 285    | 285    | 94     | 94     |
| P (bar)            | 78     | 2.0   | 3.0    | 2.7    | 8.8    | 8.7    | 26.3   | 26.0   | 78.0             | 78.0   | 78.0   | 75.7   | 75.1   | 75.1   | 74.8   | 73.6   |
| Mass Flows (kg/hr) |        |       |        |        |        |        |        |        |                  |        |        |        |        |        |        |        |
| Total              | 12166  | 88736 | 88736  | 88736  | 88736  | 88736  | 88736  | 88736  | 88736            | 100902 | 411179 | 411179 | 411179 | 246707 | 246707 | 246707 |
| CH <sub>3</sub> OH | 0      | 0     | 0      | 0      | 0      | 0      | 0      | 0      | 0                | 0      | 5477   | 5477   | 67641  | 40584  | 40584  | 40584  |
| H <sub>2</sub> O   | 44     | 735   | 735    | 735    | 735    | 735    | 735    | 735    | 735              | 779    | 1308   | 1308   | 36404  | 21843  | 21843  | 21843  |
| CO                 | 0      | 0     | 0      | 0      | 0      | 0      | 0      | 0      | 0                | 0      | 45144  | 45144  | 45371  | 27223  | 27223  | 27223  |
| CO <sub>2</sub>    | 0      | 88000 | 88000  | 88000  | 88000  | 88000  | 88000  | 88000  | 88000            | 88000  | 272574 | 272574 | 186837 | 112102 | 112102 | 112102 |
| H <sub>2</sub>     | 12123  | 0     | 0      | 0      | 0      | 0      | 0      | 0      | 0                | 12123  | 8,675  | 86675  | 74926  | 44955  | 44955  | 44955  |
| O <sub>2</sub>     | 0      | 0     | 0      | 0      | 0      | 0      | 0      | 0      | 0                | 0      | 0      | 0      | 0      | 0      | 0      | 0      |
| Stream             | 44     | 45    | 46     | 47     | 48     | 49     | 50     | 51     | 52               | 53     | 54     | 55     | 56     | 57     | 58     | 59     |
| T (°C)             | 285    | 166   | 76     | 87     | 35     | 35     | 35     | 35     | 35               | 42     | 34     | 28     | 29     | 29     | 688    | 80     |
| P (bar)            | 75.1   | 74.6  | 73.6   | 73.6   | 73.4   | 73.4   | 73.4   | 73.4   | 73.4             | 78.0   | 10.0   | 1.2    | 1.2    | 1.2    | 78     | 1.1    |
| Mass Flows (kg/hr) |        |       |        |        |        |        |        |        |                  |        |        |        |        |        |        |        |
| Total              | 164471 | 16471 | 164471 | 411178 | 411178 | 104408 | 306770 | 1534   | 305236           | 305236 | 104408 | 104408 | 102219 | 2188   | 2188   | 102219 |
| CH <sub>3</sub> OH | 27056  | 27056 | 27056  | 67640  | 67640  | 63371  | 4270   | 21     | 4248             | 4248   | 63371  | 63371  | 62949  | 421    | 421    | 62949  |
| H <sub>2</sub> O   | 14562  | 14562 | 14562  | 36404  | 36404  | 35919  | 486    | 2      | 483              | 483    | 35919  | 35919  | 35872  | 45     | 45     | 35872  |
| CO                 | 18148  | 18148 | 18148  | 45371  | 45371  | 131    | 45240  | 226    | 45014            | 45014  | 131    | 131    | 12     | 118    | 118    | 12     |
| CO <sub>2</sub>    | 74735  | 74735 | 74735  | 186836 | 186836 | 4822   | 182015 | 910    | 181105           | 181105 | 4822   | 4822   | 3384   | 1437   | 1437   | 3384   |
| H <sub>2</sub>     | 29970  | 29970 | 29970  | 74926  | 74926  | 167    | 74759  | 374    | 74386            | 74386  | 167    | 167    | 0      | 166    | 166    | 0      |
| O <sub>2</sub>     | 0      | 0     | 0      | 0      | 0      | 0      | 0      | 0      | 0                | 0      | 0      | 0      | 0      | 0      | 0      | 0      |
| Stream             | 60     | 61    | 62     | 63     | 64     | 65     | 66     | 67     | Streams for ORC  |        |        |        |        |        |        |        |
| T (°C)             | 102    | 63    | 78     | 40     | 40     | 40     | 512    | 46     | Stream           | A      | B      | C      | D      | E      |        |        |
| P (bar)            | T (°C) | 1     | 1.2    | 1      | 1      | 1      | 78     | 78     | T                | 97     | 57     | 33     | 34     | 102    |        |        |
| Mass Flows (kg/hr) |        |       |        |        |        |        |        |        | P (bar)          | 12     | 2      | 2      | 12     | 1      |        |        |
| Total              | 35819  | 66400 | 66400  | 66400  | 63547  | 2852   | 2852   | 310276 | Total            | 4500   | 4500   | 4500   | 4500   | 35747  |        |        |
| CH <sub>3</sub> OH | 0      | 62949 | 62949  | 62949  | 62141  | 808    | 808    | 5477   | R-245fa          | 4500   | 4500   | 4500   | 4500   | 0      |        |        |
| H <sub>2</sub> O   | 35819  | 53    | 53     | 53     | 53     | 0      | 0      | 529    | H <sub>2</sub> O | 0      | 0      | 0      | 0      | 35747  |        |        |
| CO                 | 0      | 12    | 12     | 12     | 0      | 11     | 11     | 45144  |                  |        |        |        |        |        |        |        |
| CO <sub>2</sub>    | 0      | 3384  | 3384   | 3384   | 1352   | 2032   | 2032   | 184574 |                  |        |        |        |        |        |        |        |
| H <sub>2</sub>     | 0      | 0     | 0      | 0      | 0      | 0      | 0      | 74552  |                  |        |        |        |        |        |        |        |
| O <sub>2</sub>     | 0      | 0     | 0      | 0      | 0      | 0      | 0      | 0      |                  |        |        |        |        |        |        |        |

**Table S6.** Results of energy balance for methanol production process corresponding to Figure 6 of the manuscript.

|                                    |            |            |            |             |             |             |             |             |             |             |             |
|------------------------------------|------------|------------|------------|-------------|-------------|-------------|-------------|-------------|-------------|-------------|-------------|
| <b>Component</b>                   | <b>REB</b> | <b>DTC</b> | <b>H1</b>  | <b>HX11</b> | <b>HX12</b> | <b>HX13</b> | <b>HX14</b> | <b>HX15</b> | <b>HX16</b> | <b>HX18</b> | <b>COND</b> |
| <b>Heating/cooling duty (kJ/s)</b> | -21129     | -24146     | 290        | -468        | -3345       | -2643       | 68791       | 28905       | -35834      | -20844      | 261         |
| <b>Component</b>                   | <b>P1</b>  | <b>TUR</b> | <b>CP5</b> | <b>CP6</b>  | <b>CP7</b>  | <b>CP8</b>  | <b>CP9</b>  | <b>CP10</b> | <b>CP11</b> | <b>CP12</b> |             |
| <b>Work (kJ/s)</b>                 | 1          | -27        | 902        | 2998        | 2551        | 2390        | 448         | 1043        | 2942        | 530         |             |

**Table S7.** Results of mass and energy balance for DME production process corresponding to Figure 7 of the manuscript.

| Stream                      | FEED  | 1     | 2     | 3     | 4      | 5     | 6      | 7     | 8      | Waste | Recycle | DME   |
|-----------------------------|-------|-------|-------|-------|--------|-------|--------|-------|--------|-------|---------|-------|
| Temp. (°C)                  | 40    | 40    | 64    | 153   | 350    | 150   | 90     | 167   | 138    | 180   | 138     | 61    |
| Press. (bar)                | 1     | 15    | 15    | 15    | 14     | 14    | 15     | 15    | 10     | 10    | 15      | 15    |
| <b>Mass Flows (kg/hr)</b>   |       |       |       |       |        |       |        |       |        |       |         |       |
| Total                       | 62120 | 62120 | 78321 | 78320 | 78321  | 78321 | 78321  | 33666 | 16201  | 17464 | 16201   | 44653 |
| CH <sub>3</sub> OH          | 62120 | 62120 | 77647 | 77647 | 15528  | 15528 | 15528  | 15528 | 15528  | 0.97  | 15528   | 0.17  |
| H <sub>2</sub> O            | 0     | 0     | 673   | 673   | 18137  | 18137 | 18137  | 18137 | 673    | 17463 | 673     | 0     |
| CO                          | 0     | 0     | 0     | 0     | 0      | 0     | 0      | 0     | 0      | 0     | 0       | 0     |
| CO <sub>2</sub>             | 0     | 0     | 0     | 0     | 0      | 0     | 0      | 0     | 0      | 0     | 0       | 0     |
| H <sub>2</sub>              | 0     | 0     | 0     | 0     | 0      | 0     | 0      | 0     | 0      | 0     | 0       | 0     |
| DME                         | 0     | 0     | 0.003 | 0.003 | 44653  | 44653 | 44653  | 0.003 | 0.003  | 0     | 0.003   | 44653 |
| <b>Energy Balance</b>       |       |       |       |       |        |       |        |       |        |       |         |       |
| Component                   | HE1   |       | R1    |       | CHILL1 |       | DTC1   |       | DTC2   |       |         |       |
| Heating/Cooling duty (kJ/s) | 14923 |       | 14864 |       | -15609 |       | -63431 |       | -10879 |       |         |       |
| Component                   | P1    |       | P2    |       |        |       |        |       |        |       |         |       |
| Work (kJ/s)                 | 34    |       | 6     |       |        |       |        |       |        |       |         |       |
